# Supplementary material for: Influence of Rice Husk Biochar on Soil Nematode Community under Upland and Flooded Conditions: A Microcosm Experiment
Source: MDPI journal article supplement (doi:10.3390/agronomy12020378), 2022-02-02
Supplement: s1 [file s1]

**Supplementary Table S1.** Effects of biochar on nematodes community composition upon water regime and time. Values are mean of log(X+1) ± standard deviation (n = 3). The different letters after a mean value indicate significant differences between biochar application rates in the corresponding water regime and each sampling time by Tukey's HSD test at p < 0.05, while global differences of the biochar (B), water (W) and time (T), and their interaction are also shown by three factors generalized linear mixed model test, \*p < 0.05, \*\*p < 0.01; \*\*\*p < 0.001; ns = not significant.

| Taxon                  | Week 2             |                   |                   |                    |           |           |           |                   |                    |                   |                   |                   | Week 3             |             |                    |                   |     |     |     |     |     |     |       |  | P |  |  |  |  |  |  |  |
|------------------------|--------------------|-------------------|-------------------|--------------------|-----------|-----------|-----------|-------------------|--------------------|-------------------|-------------------|-------------------|--------------------|-------------|--------------------|-------------------|-----|-----|-----|-----|-----|-----|-------|--|---|--|--|--|--|--|--|--|
|                        | Upland             |                   |                   |                    | Flooding  |           |           |                   | Upland             |                   |                   |                   | Flooding           |             |                    |                   |     |     |     |     |     |     |       |  |   |  |  |  |  |  |  |  |
|                        | B0                 | B5                | B20               | B40                | B0        | B5        | B20       | B40               | B0                 | B5                | B20               | B40               | B0                 | B5          | B20                | B40               | B   | W   | T   | BxW | BxT | WxT | BxWxT |  |   |  |  |  |  |  |  |  |
| <i>Achromadora</i>     | 0±0                | 0±0               | 0±0               | 0±0                | 0±0       | 0±0       | 0±0       | 0±0               | 0.43±0.75          | 0.36±0.62         | 0±0               | 0.41±0.72         | 0±0                | 0±0         | 0±0                | 0±0               | ns  | **  | ns  | ns  | ns  | ns  | ns    |  |   |  |  |  |  |  |  |  |
| <i>Acroboloides</i>    | 0±0                | 0±0               | 0±0               | 0±0                | 1.29±0.09 | 0±0       | 0.84±0.73 | 0±0               | 0.35±0.61          | 1.43±0.22         | 0.54±0.94         | 0±0               | 0.62±0.56          | 0.8±0.69    | 0.29±0.51          | 0.86±0.76         | ns  | ns  | *** | ns  | *   | **  | **    |  |   |  |  |  |  |  |  |  |
| <i>Alaimus</i>         | 0±0                | 0±0               | 0±0               | 0±0                | 0±0       | 0±0       | 0±0       | 0±0               | 0±0                | 0±0               | 0±0               | 0±0               | 0±0                | 0±0         | 0±0                | 0±0               | ns    |  |   |  |  |  |  |  |  |  |
| <i>Anaplectus</i>      | 1.59±0.04          | 1.46±0.08         | 1.6±0.18          | 1.56±0.28          | 0.89±0.77 | 0.89±0.77 | 1.56±0.1  | 0.91±0.82         | 1.91±0.07          | 2.06±0.27         | 2.21±0.03         | 2.19±0.35         | 1.24±0.18          | 0.8±0.69    | 1.47±0.43          | 0.52±0.9          | *   | *** | *** | ns  | ns  | ns  | ns    |  |   |  |  |  |  |  |  |  |
| <i>Aphelenchoides</i>  | 0±0                | 0±0               | 0±0               | 0±0                | 0±0       | 0±0       | 0±0       | 0±0               | 0.35±0.61          | 0±0               | 0±0               | 0±0               | 0±0                | 0±0         | 0±0                | 0±0               | ns  | ns  | *   | ns  | ns  | ns  | *     |  |   |  |  |  |  |  |  |  |
| <i>Aporcelaimellus</i> | 0±0                | 0.35±0.6          | 0.39±0.67         | 0±0                | 0±0       | 0±0       | 0±0       | 0.29±0.5          | 0.35±0.61          | 0.42±0.73         | 0.45±0.77         | 0±0               | 0±0                | 0.31±0.54   | 0±0                | 0±0               | ns  | *   | ns  | ns  | ns  | ns  | ns    |  |   |  |  |  |  |  |  |  |
| <i>Chronogaster</i>    | 1.53±0.3           | 1.66±0.14         | 0.88±0.78         | 1.2±0.14           | 0.92±0.8  | 1.01±0.88 | 0±0       | 0.86±0.75         | 2.29±0.29          | 1.17±1.03         | 2.03±0.03         | 2.08±0.27         | <b>0.37±0.63ab</b> | <b>0±0b</b> | <b>0.62±0.54ab</b> | <b>1.17±0.08a</b> | *   | *** | *   | ns  | **  | *** | ns    |  |   |  |  |  |  |  |  |  |
| <i>Cryptonchus</i>     | 0±0                | 0±0               | 0±0               | 0±0                | 0±0       | 0±0       | 0±0       | 0±0               | 0±0                | 0±0               | 0±0               | 0±0               | 0±0                | 0±0         | 0±0                | 0±0               | ns  | *   | ns  | ns  | ns  | ns  | ns    |  |   |  |  |  |  |  |  |  |
| <i>Ditylenchus</i>     | 0±0                | 0±0               | 0±0               | 0±0                | 0±0       | 0±0       | 0±0       | 0±0               | 0.45±0.78          | 0.36±0.62         | 0±0               | 0.41±0.72         | 0±0                | 0±0         | 0±0                | 0±0               | ns  | ns  | *   | ns  | ns  | *   | ns    |  |   |  |  |  |  |  |  |  |
| <i>Dorylaimus</i>      | 0.34±0.59          | 0±0               | 0±0               | 0.69±0.6           | 0±0       | 0.56±0.97 | 0±0       | 0.35±0.61         | 1.00±0.89          | 0.78±0.69         | 1.17±0.13         | 0±0               | 0±0                | 0±0         | 0±0                | 0±0               | ns  | *** | *   | ns  | ns  | ns  | **    |  |   |  |  |  |  |  |  |  |
| <i>Filenchus</i>       | 1.12±0.3           | 1.31±0.25         | 1.14±0.28         | 0.32±0.56          | 0±0       | 0.85±0.74 | 0.36±0.62 | 0±0               | 1.93±0.3           | 2.13±0.2          | 2.02±0.52         | 2.2±0.41          | 0±0                | 0.71±0.62   | 1.03±0.9           | 1.27±0.24         | ns  | *** | *** | *   | **  | **  | ns    |  |   |  |  |  |  |  |  |  |
| <i>Hirschmanniella</i> | 0.86±0.79          | 1.16±0.15         | 0±0               | 0.76±0.68          | 0.37±0.63 | 0±0       | 0±0       | 0.63±0.55         | 1.58±0.28          | 1.59±0.28         | 1.75±0.07         | 1.59±0.3          | 0.26±0.45          | 0±0         | 0.75±0.65          | 0.33±0.56         | ns  | *** | *** | ns  | *   | *   | ns    |  |   |  |  |  |  |  |  |  |
| <i>Mesodorylaimus</i>  | <b>1.71±0.19ab</b> | <b>1.84±0.14a</b> | <b>0.71±0.67b</b> | <b>1.58±0.48ab</b> | 0.37±0.63 | 0±0       | 0.73±0.66 | <b>1.93±0.13b</b> | <b>2.32±0.09a</b>  | <b>1.74±0.09b</b> | <b>1.98±0.07b</b> | 0.8±0.72          | 0.72±0.64          | 1.39±0.28   | 0.33±0.56          | *                 | *** | *** | ns  | *   | *   | ns  | ns    |  |   |  |  |  |  |  |  |  |
| <i>Mesorhabditis</i>   | 0±0                | 0.35±0.6          | 0±0               | 0±0                | 0±0       | 0±0       | 0±0       | 0±0               | <b>0.97±0.85ab</b> | <b>1.36±0.25a</b> | <b>0±0b</b>       | <b>1.41±0.28a</b> | 0±0                | 0±0         | 0.39±0.67          | *                 | *** | *** | ns  | *** | **  | **  | **    |  |   |  |  |  |  |  |  |  |
| <i>Monhystera</i>      | 0±0                | 0±0               | 0±0               | 0±0                | 0.37±0.63 | 0±0       | 0.36±0.62 | 0±0               | 0±0                | 0±0               | 0±0               | 0±0               | 0±0                | 0.4±0.7     | 0±0                | 0±0               | ns  | *   | *** | ns  | ns  | *** | ns    |  |   |  |  |  |  |  |  |  |
| <i>Mononchus</i>       | 0±0                | 0±0               | 0±0               | 0±0                | 0±0       | 0±0       | 0±0       | 0±0               | 1.14±0.14          | 0±0               | 0±0               | 0.42±0.73         | 0±0                | 0±0         | 0±0                | 0±0               | ns  | **  | ns  | ns  | ns  | ns  | ns    |  |   |  |  |  |  |  |  |  |
| <i>Mylonchulus</i>     | 0±0                | 0.36±0.63         | 0.45±0.78         | 0±0                | 0±0       | 0±0       | 0±0       | 0±0               | 1.23±0.16          | 0±0               | 0.45±0.77         | 0.85±0.78         | 0±0                | 0±0         | 0±0                | 0±0               | ns  | *** | *** | ns  | ns  | *** | ns    |  |   |  |  |  |  |  |  |  |
| <i>Nygodolaimus</i>    | 0±0                | 0.71±0.62         | 0±0               | 0±0                | 0±0       | 0±0       | 0±0       | 0±0               | 0.35±0.61          | 1.16±1.04         | 0.93±0.81         | 1.03±0.89         | 0±0                | 0±0         | 0±0                | 0±0               | **  | *** | **  | *   | ns  | **  | ns    |  |   |  |  |  |  |  |  |  |
| <i>Panagrolaimus</i>   | 1.14±0.99          | 1.51±0.42         | 0±0               | 0.56±0.98          | 1.46±0.32 | 1.57±0.12 | 0.92±0.8  | 1.62±0.17         | 2.04±0.13          | 1.87±0.11         | 1.8±0.25          | 1.37±0.42         | 0.96±0.83          | 0.8±0.69    | 1.57±0.16          | 1.33±0.19         | ns  | *   | **  | ns  | *   | *** | ns    |  |   |  |  |  |  |  |  |  |
| <i>Plectus</i>         | 0.43±0.75          | 0.35±0.6          | 0.35±0.61         | 0.32±0.56          | 0±0       | 0±0       | 0±0       | 0±0               | 0.45±0.78          | 0.51±0.88         | 0.93±0.81         | 0.52±0.89         | 0.34±0.59          | 0.4±0.7     | 0.29±0.51          | 0±0               | ns  | *** | **  | ns  | ns  | ns  | ns    |  |   |  |  |  |  |  |  |  |
| <i>Prismatolaimus</i>  | 0±0                | 0.72±0.62         | 0±0               | 0.34±0.59          | 0±0       | 0±0       | 0±0       | 0±0               | 1.63±0.12          | 1.75±0.32         | 1.3±1.13          | 2.5±0.21          | 0±0                | 0±0         | 0.39±0.67          | *                 | *** | *** | ns  | ns  | *** | ns  |       |  |   |  |  |  |  |  |  |  |
| <i>Protorhabditis</i>  | 0±0                | 0±0               | 0±0               | 0±0                | 0±0       | 0±0       | 0±0       | 0±0               | 0±0                | 0.36±0.62         | 0±0               | 0±0               | 0±0                | 0±0         | 0±0                | 0±0               | ns  | *   | *   | ns  | ns  | *   | ns    |  |   |  |  |  |  |  |  |  |
| <i>Rhabdolaimus</i>    | 0±0                | 0±0               | 0±0               | 0±0                | 0±0       | 0±0       | 0±0       | 0±0               | 0±0                | 0.61±1.05         | 0±0               | 0±0               | 0±0                | 0±0         | 0±0                | 0±0               | ns  | *** | *** | ns  | ns  | *** | *     |  |   |  |  |  |  |  |  |  |
| <i>Thornemema</i>      | 0.49±0.85          | 0.36±0.62         | 0.55±0.53         | 0.35±0.6           | 0±0       | 0.38±0.67 | 0.45±0.78 | 0±0               | <b>1.91±0.22ab</b> | <b>2.4±0.16a</b>  | <b>2.3±0.26ab</b> | <b>1.89±0.11b</b> | 0±0                | 0±0         | 0±0                | 0.71±0.63         | ns  | *** | *** | ns  | ns  | *** | ns    |  |   |  |  |  |  |  |  |  |
| <i>Tobrilus</i>        | 0±0                | 0±0               | 0±0               | 0.66±0.57          | 0±0       | 0±0       | 0±0       | 0±0               | 0.45±0.78          | 0±0               | 0±0               | 0.34±0.59         | 0±0                | 0±0         | 0±0                | 0±0               | ns  | *   | ns  | ns  | ns  | ns  | ns    |  |   |  |  |  |  |  |  |  |
| <i>Tripyla</i>         | 1.06±0.2           | 1.02±0.98         | 0.67±0.58         | 0.85±0.74          | 0.89±0.83 | 1.33±0.16 | 0.9±0.8   | 0.34±0.59         | 1.61±0.12          | 1.42±0.37         | 1.7±0.16          | 1.23±1.07         | 1.14±0.21          | 0.8±0.69    | 0.29±0.51          | 0.47±0.82         | ns  | *** | **  | ns  | ns  | *   | ns    |  |   |  |  |  |  |  |  |  |

| Taxon                  | Week 4            |                   |                    |                   |           |           |           |           |                    |                   |                    |                    | Week 8    |           |           |           |    |     |     |     |     |     |       |  | P |  |  |  |  |  |  |  |
|------------------------|-------------------|-------------------|--------------------|-------------------|-----------|-----------|-----------|-----------|--------------------|-------------------|--------------------|--------------------|-----------|-----------|-----------|-----------|----|-----|-----|-----|-----|-----|-------|--|---|--|--|--|--|--|--|--|
|                        | Upland            |                   |                    |                   | Flooding  |           |           |           | Upland             |                   |                    |                    | Flooding  |           |           |           |    |     |     |     |     |     |       |  |   |  |  |  |  |  |  |  |
|                        | B0                | B5                | B20                | B40               | B0        | B5        | B20       | B40       | B0                 | B5                | B20                | B40                | B0        | B5        | B20       | B40       | B  | W   | T   | BxW | BxT | WxT | BxWxT |  |   |  |  |  |  |  |  |  |
| <i>Achromadora</i>     | 0.36±0.62         | 0±0               | 0±0                | 0.76±0.66         | 0±0       | 0±0       | 0±0       | 0±0       | 0.71±0.62          | 0±0               | 0.37±0.65          | 0.37±0.64          | 0±0       | 0±0       | 0±0       | 0±0       | ns | **  | ns  | ns  | ns  | ns  | ns    |  |   |  |  |  |  |  |  |  |
| <i>Acroboloides</i>    | 1.62±0.09         | 1.09±0.04         | 0.94±0.82          | 1.51±0.18         | 0.46±0.8  | 0.37±0.64 | 1.22±0.17 | 0.74±0.64 | 1.18±0.18          | 0.42±0.73         | 1.29±0.19          | 0.37±0.64          | 0±0       | 0±0       | 0.49±0.85 | 0.98±0.85 | ns | ns  | *** | ns  | *   | **  | **    |  |   |  |  |  |  |  |  |  |
| <i>Alaimus</i>         | 0±0               | 0±0               | 0±0                | 0±0               | 0±0       | 0±0       | 0±0       | 0±0       | 0.35±0.6           | 0±0               | 0±0                | 0±0                | 0±0       | 0±0       | 0±0       | 0±0       | ns | ns  | ns  | ns  | ns  | ns  | ns    |  |   |  |  |  |  |  |  |  |
| <i>Anaplectus</i>      | 2.02±0.13         | 2.01±0.12         | 2.26±0.21          | 2.13±0.24         | 1.19±0.16 | 1.26±0.26 | 1.63±0.23 | 0.9±0.81  | <b>1.59±0.2ab</b>  | <b>1.75±0.06a</b> | <b>1.64±0.05ab</b> | <b>0.54±0.94b</b>  | 0.49±0.85 | 0.28±0.48 | 0.38±0.66 | 0.37±0.64 | *  | *** | *** | ns  | ns  | ns  | ns    |  |   |  |  |  |  |  |  |  |
| <i>Aphelenchoides</i>  | 0.38±0.65         | 0±0               | 0±0                | 0.9±0.82          | 0±0       | 0.37±0.64 | 0±0       | 0±0       | 0±0                | 0±0               | 0±0                | 0±0                | 0±0       | 0±0       | 0±0       | 0±0       | ns | ns  | *   | ns  | ns  | ns  | *     |  |   |  |  |  |  |  |  |  |
| <i>Aporcelaimellus</i> | 0.36±0.62         | 0±0               | 0.96±0.93          | 0±0               | 0±0       | 0±0       | 0±0       | 0±0       | 0±0                | 0±0               | 0±0                | 0±0                | 0±0       | 0±0       | 0±0       | 0±0       | ns | *   | ns  | ns  | ns  | ns  | ns    |  |   |  |  |  |  |  |  |  |
| <i>Chronogaster</i>    | 2.2±0.23          | 1.82±0.1          | 1.9±0.25           | 1.9±0.09          | 0.36±0.63 | 0.74±0.64 | 0±0       | 0±0       | <b>2.12±0.3a</b>   | <b>1.46±0.22b</b> | <b>1.54±0.16ab</b> | <b>1.74±0.18ab</b> | 0±0       | 0±0       | 0±0       | 0±0       | *  | *** | *   | ns  | **  | *** | ns    |  |   |  |  |  |  |  |  |  |
| <i>Cryptonchus</i>     | 0±0               | 0±0               | 0±0                | 0.37±0.65         | 0±0       | 0±0       | 0±0       | 0±0       | 0.35±0.6           | 0.42±0.73         | 0±0                | 0.35±0.61          | 0±0       | 0±0       | 0±0       | 0±0       | ns | *   | ns  | ns  | ns  | ns  | ns    |  |   |  |  |  |  |  |  |  |
| <i>Ditylenchus</i>     | 0±0               | 0±0               | 0±0                | 0±0               | 0±0       | 0±0       | 0±0       | 0±0       | 0±0                | 0±0               | 0±0                | 0±0                | 0±0       | 0±0       | 0±0       | 0±0       | ns | ns  | *   | ns  | ns  | *   | ns    |  |   |  |  |  |  |  |  |  |
| <i>Dorylaimus</i>      | 1.84±0.18         | 1.17±1.02         | 0.61±1.05          | 0.47±0.81         | 0±0       | 0.37±0.64 | 0±0       | 0.84±0.74 | 0±0                | 0.8±0.69          | 0±0                | 1.17±0.14          | 0.32±0.55 | 0±0       | 0±0       | 0±0       | ns | *** | *   | ns  | ns  | ns  | **    |  |   |  |  |  |  |  |  |  |
| <i>Filenchus</i>       | 2.27±0.14         | 2.22±0.12         | 2.15±0.12          | 2.15±0.13         | 1.1±0.01  | 0±0       | 0.52±0.89 | 0.93±0.81 | 2.13±0.15          | 2.17±0.24         | 1.72±0.17          | 1.75±0.15          | 0±0       | 0.28±0.48 | 0.38±0.66 | 0.47±0.81 | ns | *** | *** | *   | **  | **  | ns    |  |   |  |  |  |  |  |  |  |
| <i>Hirschmanniella</i> | 1.18±1.03         | 1.6±0.25          | 1.69±0.17          | 1.77±0.07         | 0.37±0.64 | 0.37±0.64 | 0.74±0.64 | 0±0       | 1.38±0.25          | 1.31±0.21         | 0.88±0.81          | 0.92±0.86          | 0±0       | 0±0       | 0±0       | 0±0       | ns | *** | *** | ns  | ns  | **  | ns    |  |   |  |  |  |  |  |  |  |
| <i>Mesodorylaimus</i>  | <b>1.68±0.32b</b> | <b>2.27±0.09a</b> | <b>2.02±0.15ab</b> | <b>2±0.04ab</b>   | 0.88±0.8  | 1.26±0.26 | 0.76±0.65 | 0.75±0.65 | <b>1.55±0.23b</b>  | <b>2.16±0.08a</b> | <b>1.72±0.2b</b>   | <b>1.64±0.08b</b>  | 0±0       | 0.34±0.59 | 0±0       | 0±0       | *  | *** | *** | ns  | *   | *   | ns    |  |   |  |  |  |  |  |  |  |
| <i>Mesorhabditis</i>   | <b>0.9±0.78ab</b> | <b>0±0b</b>       | <b>0.45±0.78ab</b> | <b>1.57±0.27a</b> | 0±0       | 0.37±0.64 | 0±0       | 0.74±0.64 | 0±0                | 0±0               | 0.93±0.81          | 0±0                | 0±0       | 0±0       | 0±0       | 0±0       | *  | *** | *** | ns  | *** | **  | **    |  |   |  |  |  |  |  |  |  |
| <i>Monhystera</i>      | 1.06±0.92         | 1.24±0.26         | 0.94±0.82          | 0.75±0.65         | 0±0       | 0±0       | 0±0       | 0.37±0.64 | 0±0                | 0.38±0.66         | 0±0                | 0.35±0.61          | 0±0       | 0±0       | 0±0       | 0±0       | ns | *   | *** | ns  | ns  | *** | ns    |  |   |  |  |  |  |  |  |  |
| <i>Mononchus</i>       | 0±0               | 0.54±0.94         | 0.34±0.59          | 0.38±0.65         | 0±0       | 0±0       | 0±0       | 0±0       | 0±0                | 0.41±0.72         | 0.37±0.65          | 0±0                | 0±0       | 0±0       | 0±0       | 0±0       | ns | **  | ns  | ns  | ns  | ns  | ns    |  |   |  |  |  |  |  |  |  |
| <i>Mylonchulus</i>     | 0.38±0.65         | 0.8±0.71          | 0.44±0.76          | 0.85±0.75         | 0±0       | 0±0       | 0±0       | 0±0       | 1.56±0.15          | 1.11±0.23         | 1.91±0.53          | 1.11±1             | 0±0       | 0±0       | 0±0       | 0±0       | ns | *** | *** | ns  | ns  | *** | ns    |  |   |  |  |  |  |  |  |  |
| <i>Nygodolaimus</i>    | 0.81±0.71         | 1.43±0.1          | 0.45±0.78          | 1.32±0.32         | 0±0       | 0±0       | 0±0       | 0±0       | <b>0.37±0.64ab</b> | <b>1.41±0.27a</b> | <b>0±0b</b>        | <b>0.82±0.73ab</b> | 0±0       | 0.34±0.59 | 0±0       | 0±0       | ns | **  | *** | **  | *   | ns  | **    |  |   |  |  |  |  |  |  |  |
| <i>Panagrolaimus</i>   | 1.88±0.3          | 1.95±0.13         | 1.93±0.28          | 1.88±0.17         | 1.72±0.16 | 1.39±0.29 | 1.63±0.41 | 0.52±0.91 | 2.12±0.04          | 1.61±0.21         | 1.57±0.27          | 1.33±0.33          | 1.13±0.32 | 0.94±0.82 | 1.03±0.9  | ns        | *  | **  | ns  | *   | *** | ns  |       |  |   |  |  |  |  |  |  |  |
| <i>Plectus</i>         | 1.18±0.14         | 1.73±0.2          | 0.89±0.83          | 1.21±1.06         | 0.36±0.63 | 0.37±0.64 | 0.46±0.8  | 0.37±0.64 | 1.33±0.2           | 0.38±0.66         | 0.36±0.62          | 0.8±0.7            | 0±0       | 0±0       | 0±0       | 0±0       | ns | *** | **  | ns  | ns  | ns  | ns    |  |   |  |  |  |  |  |  |  |
| <i>Prismatolaimus</i>  | <b>2.32±0.1ab</b> |                   |                    |                   |           |           |           |           |                    |                   |                    |                    |           |           |           |           |    |     |     |     |     |     |       |  |   |  |  |  |  |  |  |  |

**Supplementary Table S2.** Effects of biochar on trophic structure upon water regime and time. Values are mean of  $\log(X+1) \pm$  standard deviation ( $n = 3$ ). The different letters after a mean value indicate significant differences between biochar application rates in the corresponding water regime and sampling time by Tukey's HSD test at  $p < 0.05$ , while global differences of the biochar (B), water (W) and time (T), and their interaction are also shown by three factors generalized linear mixed model test, \* $p < 0.05$ , \*\* $p < 0.01$ , \*\*\* $p < 0.001$ ; ns = not significant.

| Time (T) | Water (W) | Biochar (B) | cp1       | cp2                     | cp3                     | cp4       | cp5                     |
|----------|-----------|-------------|-----------|-------------------------|-------------------------|-----------|-------------------------|
| Week 2   | Upland    | B0          | 1.14±0.99 | 1.76±0.15               | 1.74±0.34               | 0.34±0.59 | 1.76±0.25 <sup>ab</sup> |
|          |           | B5          | 1.55±0.43 | 1.73±0.02               | 1.98±0.18               | 0.36±0.63 | 1.93±0.09 <sup>a</sup>  |
|          |           | B20         | 0±0       | 1.77±0.15               | 0.99±0.87               | 0.45±0.78 | 1.21±0.28 <sup>b</sup>  |
|          |           | B40         | 0.56±0.98 | 1.59±0.33               | 1.54±0.44               | 0.69±0.60 | 1.68±0.32 <sup>ab</sup> |
|          | Flooding  | B0          | 1.52±0.31 | 1.48±0.25               | 1.47±0.39               | 0±0       | 0.37±0.63               |
|          |           | B5          | 1.57±0.12 | 1.06±0.93               | 1.62±0.19               | 0.56±0.97 | 0.38±0.67               |
|          |           | B20         | 0.98±0.85 | 1.69±0.17               | 0.90±0.80               | 0±0       | 0.45±0.78               |
|          |           | B40         | 1.62±0.17 | 0.91±0.82               | 1.25±0.36               | 0±0       | 0.82±0.71               |
| Week 3   | Upland    | B0          | 2.10±0.17 | 2.3±0.12                | 2.53±0.21 <sup>ab</sup> | 1.52±0.16 | 2.25±0.09 <sup>b</sup>  |
|          |           | B5          | 2.01±0.10 | 2.49±0.13               | 2.3±0.17 <sup>b</sup>   | 1±0.89    | 2.70±0.14 <sup>a</sup>  |
|          |           | B20         | 1.80±0.25 | 2.53±0.17               | 2.43±0.06 <sup>ab</sup> | 0.93±0.81 | 2.46±0.15 <sup>ab</sup> |
|          |           | B40         | 1.76±0.21 | 2.51±0.39               | 2.76±0.04 <sup>a</sup>  | 1.52±0.2  | 2.29±0.05 <sup>b</sup>  |
|          | Flooding  | B0          | 0.96±0.83 | 1.4±0.19                | 1.26±0.27               | 0±0       | 0.8±0.72                |
|          |           | B5          | 0.89±0.79 | 1.42±0.41               | 0.8±0.69                | 0±0       | 0.81±0.70               |
|          |           | B20         | 1.57±0.16 | 1.81±0.11               | 1.17±0.23               | 0±0       | 1.39±0.28               |
|          |           | B40         | 1.38±0.26 | 1.64±0.17               | 1.42±0.31               | 0±0       | 0.81±0.70               |
| Week 4   | Upland    | B0          | 2.08±0.24 | 2.55±0.09               | 2.67±0.15               | 1.86±0.21 | 2.31±0.06 <sup>c</sup>  |
|          |           | B5          | 2.06±0.09 | 2.53±0.06               | 2.59±0.04               | 1.66±0.51 | 2.74±0.07 <sup>a</sup>  |
|          |           | B20         | 2.07±0.27 | 2.57±0.08               | 2.52±0.15               | 1.1±0.97  | 2.61±0.08 <sup>ab</sup> |
|          |           | B40         | 2.11±0.07 | 2.58±0.09               | 2.8±0.07                | 1.35±0.38 | 2.47±0.03 <sup>bc</sup> |
|          | Flooding  | B0          | 1.72±0.16 | 1.57±0.18               | 0.83±0.73               | 0±0       | 0.93±0.85               |
|          |           | B5          | 1.45±0.30 | 1.50±0.10               | 1.26±0.26               | 0.37±0.64 | 1.26±0.26               |
|          |           | B20         | 1.63±0.41 | 1.91±0.05               | 1.46±0.07               | 0±0       | 0.76±0.65               |
|          |           | B40         | 0.97±0.90 | 1.54±0.40               | 0.46±0.80               | 0.84±0.74 | 0.75±0.65               |
| Week 8   | Upland    | B0          | 1.33±0.20 | 2.32±0.13 <sup>a</sup>  | 2.5±0.16 <sup>a</sup>   | 1.62±0.21 | 2.86±0.05 <sup>ab</sup> |
|          |           | B5          | 1.22±1.07 | 2.34±0.13 <sup>a</sup>  | 2.26±0.04 <sup>ab</sup> | 1.66±0.20 | 3.09±0.10 <sup>a</sup>  |
|          |           | B20         | 1.76±0.16 | 2.08±0.08 <sup>ab</sup> | 2.09±0.11 <sup>b</sup>  | 1.91±0.54 | 2.69±0.15 <sup>b</sup>  |
|          |           | B40         | 1.61±0.26 | 1.89±0.23 <sup>b</sup>  | 2.4±0.12 <sup>a</sup>   | 1.68±0.26 | 2.24±0.09 <sup>c</sup>  |
|          | Flooding  | B0          | 1.33±0.33 | 0.49±0.85               | 0.32±0.55               | 0.32±0.55 | 0±0                     |
|          |           | B5          | 1.13±0.32 | 0.56±0.48               | 0.28±0.48               | 0±0       | 0.43±0.75               |
|          |           | B20         | 0.94±0.82 | 0.96±0.84               | 0.94±0.82               | 0±0       | 0±0                     |
|          |           | B40         | 1.03±0.90 | 1.45±0.30               | 0.51±0.88               | 0±0       | 0±0                     |
| p        |           | B           | ns        | ns                      | ns                      | ns        | ns                      |
|          |           | W           | *         | ***                     | ***                     | ***       | ***                     |
|          |           | T           | ***       | ***                     | ***                     | ***       | ***                     |
|          |           | BxW         | ns        | ns                      | ns                      | ns        | ns                      |
|          |           | BxT         | ns        | ns                      | *                       | ns        | ns                      |
|          |           | WxT         | ***       | **                      | ***                     | ***       | ***                     |
|          |           | BxWxT       | ns        | ns                      | ns                      | ns        | ns                      |

**Supplementary Table S3.** Correlation of nematode abundance and soil properties in upland conditions

| R value         | Ach    | Acr          | Ala    | Ana          | Aph          | Apo    | Chr          | Cry    | Dit          | Dor          | Fil          | Hir          | Meso         | Mesor        | Monh         | Mon    | Myl          | Nyg          | Pan          | Ple    | Pri          | Prot         | Rha          | Tho          | Tob    | Tri          |  |
|-----------------|--------|--------------|--------|--------------|--------------|--------|--------------|--------|--------------|--------------|--------------|--------------|--------------|--------------|--------------|--------|--------------|--------------|--------------|--------|--------------|--------------|--------------|--------------|--------|--------------|--|
| Moisture        | 0.005  | 0.063        | -0.240 | -0.050       | 0.212        | -0.218 | -0.210       | -0.086 | -0.111       | -0.030       | -0.289       | -0.116       | -0.017       | 0.176        | 0.180        | 0.050  | -0.089       | -0.021       | -0.012       | 0.185  | 0.196        | 0.071        | 0.248        | -0.523       | 0.153  | -0.261       |  |
| pH              | -0.280 | -0.350       | -0.130 | -0.079       | -0.019       | 0.276  | -0.363       | -0.127 | -0.038       | -0.296       | -0.325       | -0.200       | -0.238       | -0.118       | -0.379       | -0.250 | -0.180       | -0.198       | -0.377       | -0.255 | -0.253       | -0.168       | -0.249       | -0.420       | 0.026  | 0.103        |  |
| EC              | 0.249  | -0.002       | -0.134 | 0.425        | 0.014        | -0.179 | 0.198        | -0.090 | 0.432        | 0.014        | 0.170        | 0.330        | 0.310        | 0.348        | -0.277       | 0.159  | -0.055       | 0.378        | 0.251        | 0.055  | 0.203        | 0.011        | -0.169       | -0.182       | 0.228  | 0.320        |  |
| MCA             | 0.231  | 0.318        | -0.091 | 0.227        | 0.506        | 0.228  | 0.006        | 0.021  | -0.119       | -0.091       | 0.043        | 0.257        | -0.047       | 0.466        | 0.052        | 0.003  | -0.150       | -0.019       | 0.134        | 0.112  | 0.356        | 0.036        | 0.642        | -0.219       | -0.097 | -0.044       |  |
| NH <sub>4</sub> | 0.033  | -0.135       | -0.154 | 0.419        | 0.040        | 0.104  | 0.258        | -0.232 | 0.386        | -0.181       | 0.119        | 0.251        | 0.078        | 0.312        | -0.305       | 0.043  | -0.299       | 0.094        | 0.109        | -0.116 | 0.014        | -0.160       | -0.202       | -0.409       | 0.194  | 0.416        |  |
| NO <sub>3</sub> | 0.012  | 0.031        | -0.077 | 0.353        | 0.028        | -0.151 | -0.155       | 0.136  | 0.011        | 0.103        | 0.149        | 0.051        | 0.166        | 0.067        | 0.060        | 0.196  | 0.165        | 0.299        | 0.053        | 0.229  | 0.137        | 0.294        | 0.085        | 0.119        | 0.065  | -0.045       |  |
| Inorganic N     | 0.035  | -0.091       | -0.179 | 0.582        | 0.052        | -0.016 | 0.109        | -0.100 | 0.325        | -0.080       | 0.198        | 0.241        | 0.176        | 0.302        | -0.211       | 0.166  | -0.136       | 0.277        | 0.125        | 0.058  | 0.103        | 0.065        | -0.110       | -0.257       | 0.203  | 0.312        |  |
| PO <sub>4</sub> | -0.006 | -0.199       | -0.205 | 0.167        | 0.038        | -0.242 | -0.307       | 0.160  | 0.130        | -0.009       | -0.113       | -0.136       | 0.100        | 0.004        | -0.078       | 0.109  | 0.171        | 0.204        | -0.106       | 0.217  | 0.314        | 0.045        | 0.024        | -0.111       | 0.066  | -0.098       |  |
| P value         |        |              |        |              |              |        |              |        |              |              |              |              |              |              |              |        |              |              |              |        |              |              |              |              |        |              |  |
| Moisture        | 0.972  | 0.671        | 0.100  | 0.736        | 0.148        | 0.136  | 0.153        | 0.562  | 0.454        | 0.841        | <b>0.046</b> | 0.431        | 0.908        | 0.232        | 0.221        | 0.739  | 0.546        | 0.888        | 0.938        | 0.209  | 0.183        | 0.632        | 0.089        | <b>0.000</b> | 0.301  | 0.074        |  |
| pH              | 0.054  | <b>0.015</b> | 0.378  | 0.595        | 0.897        | 0.057  | <b>0.011</b> | 0.389  | 0.797        | <b>0.041</b> | <b>0.024</b> | 0.173        | 0.104        | 0.426        | <b>0.008</b> | 0.087  | 0.222        | 0.177        | <b>0.008</b> | 0.081  | 0.083        | 0.254        | 0.088        | <b>0.003</b> | 0.863  | 0.488        |  |
| EC              | 0.088  | 0.991        | 0.363  | <b>0.003</b> | 0.923        | 0.224  | 0.178        | 0.542  | <b>0.002</b> | 0.925        | 0.248        | <b>0.022</b> | <b>0.032</b> | <b>0.015</b> | 0.057        | 0.279  | 0.711        | <b>0.008</b> | 0.086        | 0.709  | 0.167        | 0.942        | 0.250        | 0.217        | 0.120  | <b>0.027</b> |  |
| MCA             | 0.115  | <b>0.028</b> | 0.538  | 0.120        | <b>0.000</b> | 0.119  | 0.967        | 0.885  | 0.419        | 0.539        | 0.770        | 0.078        | 0.750        | <b>0.001</b> | 0.725        | 0.986  | 0.310        | 0.896        | 0.363        | 0.448  | <b>0.013</b> | 0.809        | <b>0.000</b> | 0.135        | 0.512  | 0.764        |  |
| NH <sub>4</sub> | 0.825  | 0.360        | 0.295  | <b>0.003</b> | 0.786        | 0.482  | 0.076        | 0.113  | <b>0.007</b> | 0.218        | 0.421        | 0.086        | 0.596        | <b>0.031</b> | <b>0.035</b> | 0.774  | <b>0.039</b> | 0.527        | 0.460        | 0.432  | 0.926        | 0.278        | 0.168        | <b>0.004</b> | 0.187  | <b>0.003</b> |  |
| NO <sub>3</sub> | 0.936  | 0.836        | 0.602  | <b>0.014</b> | 0.848        | 0.305  | 0.292        | 0.355  | 0.942        | 0.484        | 0.312        | 0.731        | 0.260        | 0.651        | 0.686        | 0.182  | 0.263        | <b>0.039</b> | 0.722        | 0.118  | 0.354        | <b>0.043</b> | 0.565        | 0.420        | 0.661  | 0.759        |  |
| Inorganic N     | 0.813  | 0.540        | 0.224  | <b>0.000</b> | 0.725        | 0.916  | 0.462        | 0.501  | <b>0.024</b> | 0.590        | 0.178        | 0.100        | 0.232        | <b>0.037</b> | 0.150        | 0.259  | 0.357        | 0.057        | 0.396        | 0.698  | 0.486        | 0.660        | 0.458        | 0.078        | 0.166  | <b>0.031</b> |  |
| PO <sub>4</sub> | 0.970  | 0.175        | 0.163  | 0.256        | 0.799        | 0.098  | <b>0.034</b> | 0.278  | 0.380        | 0.952        | 0.444        | 0.357        | 0.499        | 0.978        | 0.597        | 0.463  | 0.246        | 0.165        | 0.474        | 0.139  | <b>0.030</b> | 0.764        | 0.871        | 0.453        | 0.657  | 0.508        |  |

P value in bold indicates significant correlation

**Supplementary Table S4.** Correlation of nematode abundance and soil properties in flooding conditions

| R value         | Acr    | Ana    | Aph    | Apo    | Chr          | Dor    | Fil          | Hir    | Meso         | Mesor  | Monh   | Nyg    | Pan          | Ple    | Pri    | Rha          | Tho    | Tri          |
|-----------------|--------|--------|--------|--------|--------------|--------|--------------|--------|--------------|--------|--------|--------|--------------|--------|--------|--------------|--------|--------------|
| Moisture        | 0.093  | 0.064  | 0.036  | -0.103 | -0.099       | -0.104 | 0.025        | 0.045  | 0.178        | 0.104  | -0.097 | 0.023  | 0.225        | -0.060 | 0.198  | 0.112        | -0.237 | -0.358       |
| pH              | -0.032 | 0.171  | 0.110  | -0.108 | 0.194        | 0.208  | 0.006        | 0.240  | 0.039        | 0.144  | -0.067 | -0.061 | 0.297        | -0.074 | -0.236 | 0.165        | 0.077  | -0.014       |
| EC              | -0.028 | 0.075  | -0.138 | 0.192  | 0.068        | -0.166 | 0.222        | 0.088  | 0.224        | 0.033  | 0.029  | 0.007  | -0.154       | 0.052  | -0.076 | -0.147       | 0.044  | 0.055        |
| MCA             | -0.121 | -0.059 | 0.000  | -0.033 | -0.125       | 0.087  | 0.044        | -0.043 | 0.086        | 0.196  | 0.213  | -0.161 | -0.180       | 0.234  | -0.134 | 0.034        | -0.081 | -0.076       |
| NH <sub>4</sub> | 0.066  | -0.007 | 0.055  | -0.072 | -0.366       | -0.131 | 0.280        | 0.047  | 0.342        | 0.156  | -0.078 | 0.006  | -0.067       | 0.195  | 0.126  | 0.135        | -0.158 | -0.258       |
| NO <sub>3</sub> | -0.054 | 0.145  | -0.030 | 0.163  | 0.439        | 0.056  | -0.190       | 0.089  | -0.103       | -0.184 | 0.145  | -0.116 | 0.169        | -0.164 | -0.226 | -0.140       | 0.188  | 0.235        |
| Inorganic N     | 0.063  | 0.075  | 0.061  | -0.008 | -0.271       | -0.157 | 0.292        | 0.120  | 0.433        | 0.116  | -0.028 | -0.059 | 0.003        | 0.185  | 0.049  | 0.112        | -0.118 | -0.235       |
| PO <sub>4</sub> | -0.078 | -0.059 | -0.004 | 0.116  | 0.232        | 0.093  | 0.066        | -0.057 | -0.335       | 0.056  | -0.002 | -0.139 | 0.126        | -0.257 | -0.086 | -0.342       | 0.121  | 0.082        |
| P value         |        |        |        |        |              |        |              |        |              |        |        |        |              |        |        |              |        |              |
| Moisture        | 0.530  | 0.668  | 0.810  | 0.486  | 0.502        | 0.481  | 0.866        | 0.764  | 0.227        | 0.483  | 0.510  | 0.879  | 0.124        | 0.688  | 0.176  | 0.448        | 0.105  | <b>0.012</b> |
| pH              | 0.831  | 0.245  | 0.455  | 0.464  | 0.186        | 0.156  | 0.967        | 0.100  | 0.791        | 0.328  | 0.653  | 0.683  | <b>0.040</b> | 0.617  | 0.107  | 0.262        | 0.602  | 0.922        |
| EC              | 0.853  | 0.613  | 0.348  | 0.191  | 0.646        | 0.259  | 0.129        | 0.550  | 0.126        | 0.826  | 0.845  | 0.964  | 0.297        | 0.728  | 0.609  | 0.319        | 0.765  | 0.709        |
| MCA             | 0.412  | 0.692  | 1.000  | 0.824  | 0.396        | 0.558  | 0.765        | 0.770  | 0.559        | 0.182  | 0.145  | 0.274  | 0.221        | 0.110  | 0.366  | 0.819        | 0.582  | 0.610        |
| NH <sub>4</sub> | 0.658  | 0.963  | 0.712  | 0.626  | <b>0.010</b> | 0.374  | 0.054        | 0.752  | <b>0.017</b> | 0.291  | 0.598  | 0.966  | 0.652        | 0.185  | 0.394  | 0.361        | 0.284  | 0.076        |
| NO <sub>3</sub> | 0.713  | 0.327  | 0.841  | 0.268  | <b>0.002</b> | 0.705  | 0.196        | 0.548  | 0.486        | 0.210  | 0.327  | 0.434  | 0.251        | 0.267  | 0.123  | 0.341        | 0.201  | 0.107        |
| Inorganic N     | 0.672  | 0.613  | 0.679  | 0.955  | 0.062        | 0.288  | <b>0.044</b> | 0.418  | <b>0.002</b> | 0.431  | 0.851  | 0.692  | 0.985        | 0.208  | 0.739  | 0.447        | 0.425  | 0.108        |
| PO <sub>4</sub> | 0.598  | 0.688  | 0.979  | 0.433  | 0.112        | 0.529  | 0.654        | 0.702  | <b>0.020</b> | 0.705  | 0.989  | 0.347  | 0.393        | 0.078  | 0.559  | <b>0.017</b> | 0.413  | 0.578        |

P value in bold indicates significant correlation

Abbreviations of nematodes genera: *Achromadora* (Ach), *Acrobeloides* (Acr), *Anaplectus* (Ana), *Aphelenchoides* (Aph), *Aporcelaimellus* (Apo), *Chronogaster* (Chr), *Ditylenchus* (Dit), *Dorylaimus* (Dor), *Filenchus* (Fil), *Hirschmanniella* (Hir), *Mesodorylaimus* (Meso), *Mesorhabditis* (Mesor), *Monhystera* (Monh), *Mononchus* (Mon), *Mylonchulus* (Myl), *Nygolaimus* (Nyg), *Panagrolaimus* (Pan), *Plectus* (Ple), *Prismatolaimus* (Pri), *Protorhabditis* (Prot), *Rhabdolaimus* (Rha), *Thornenema* (Tho), *Tobrilus* (Tob), and *Tripyla* (Tri).
